# Supplementary material
Source: MDPI journal article supplement (https://www.mdpi.com/2504-4494/2/1/11)
Supplement: s1 [file s1]

## Supporting Information

# Environmental Emissions from Chemical Etching Synthesis of Silicon Nanotube for Lithium Ion Battery Applications

Lulu Ma <sup>1</sup>, Dongsheng Guan <sup>1</sup>, Fenfen Wang <sup>2</sup> and Chris Yuan <sup>1, 2\*</sup>

<sup>1</sup> Department of Mechanical Engineering, University of Wisconsin-Milwaukee, Milwaukee, WI 53211, USA; hallo.lulu@hotmail.com (L.M.); guands1@gmail.com (D.G.)

<sup>2</sup> Department of Mechanical and Aerospace Engineering, Case Western Reserve University, Cleveland, OH 44106, USA; fxw127@case.edu

\* Correspondence: chris.yuan@case.edu; Tel.: +1-216-368-5191

Figure S1 is the SEM image of Si wafer after step #1. In step #1, Si wafers (100) are immersed into 5 mM AgNO<sub>3</sub> and 5 M HF for 60 s to deposit Ag on the surface. After deposition, rough surface with curves and dots are observed.

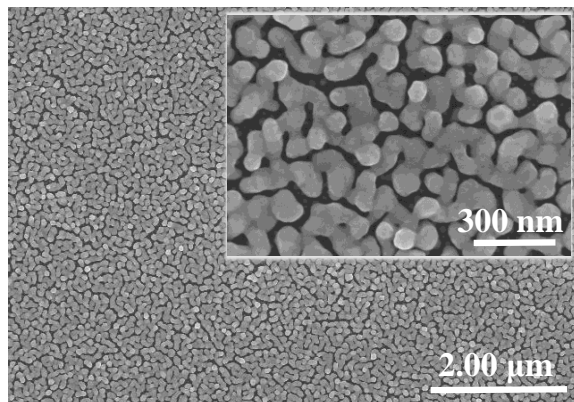

**Figure S1.** SEM image of deposited Ag after step #1.
